# Supplementary material
Source: PubMed Central journal article supplement (PMC7444012)

**SUPPLEMENTARY INFORMATION****Supplementary Table 1:** List of alternatively spliced transcripts identified in mESCs expressing *BRCA2* variants with PTC

| <b>Variants</b>    | <b>Major alternate transcripts identified</b>                                                             | <b>Transcripts that generate protein with internal deletion</b>           | <b>Transcripts that generate functional protein</b>        |
|--------------------|-----------------------------------------------------------------------------------------------------------|---------------------------------------------------------------------------|------------------------------------------------------------|
| c.407delA          | Δexon 3-7<br>Δexon 4-7<br>Δexon 5-7<br>Δ3' 39 bp of exon 6 and exon 7<br>Δ3' 39 bp of exon 6 and exon 7-8 | Δexon 3-7<br>Δexon 4-7<br>Δexon 5-7 (including one bp deletion in exon 4) | Δexon 4-7<br>Δexon 5-7 (one bp deletion in exon 4)         |
| c.470_474del AGTCA | Δexon 3-7<br>Δexon 4-7<br>Δexon 5                                                                         | Δexon 3-7<br>Δexon 4-7                                                    | Δexon 4-7                                                  |
| c.518delG          | Δexon 3-7<br>Δexon 4-7<br>Δexon 5<br>Δexon 5-7                                                            | Δexon 3-7<br>Δexon 4-7<br>Δexon 5 (including one bp deletion in exon 7)   | Δexon 4-7<br>Δexon 5 (including one bp deletion in exon 7) |
| c.610delC          | Δexon 3-7<br>Δexon 4-7<br>Δexon 5                                                                         | Δexon 3-7<br>Δexon 4-7                                                    | Δexon 4-7                                                  |
| c.632-2A>G         | Δexon 4-8<br>Δ3' 39 bp of exon 6 and exon 7<br>Δ3' 39 bp of exon 6 and exon 7-8                           | Δ3' 39 bp of exon 6 and exon 7-8                                          | Δ3' 39 bp of exon 6 and exon 7-8                           |

**Supplementary Figure 1. Genotyping of PL2F7 mouse ES cell clones by Southern blot analysis**

**A.** Schematic representation of *Brca2* null allele (*KO*) and conditional allele (*CKO*) in PL2F7 mESC and location of *EcoRV* sites in exon 11. A probe from exon 11 was used to distinguish between two alleles by Southern blot analysis of *EcoRV* digested genomic DNA. Thick line represents the location of probe.

**B.** Representative results of Southern blot analysis for HAT-resistant mESC colonies expressing *BRCA2* variants (I. c.407delA; II. c.470\_474delAGTCA, III, c.518delG, IV. c.610delC, V. c.632-2A>G). The upper band corresponds to the conditional allele, and the lower band corresponds to the mutant allele. Band sizes are marked on the right. *Brca2*<sup>KO/KO</sup> mESC are marked with an arrow.

# Supplementary Figure 1

A

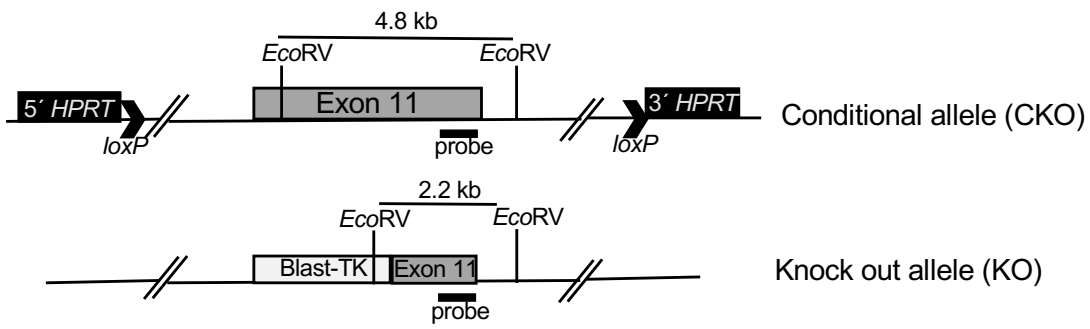

B

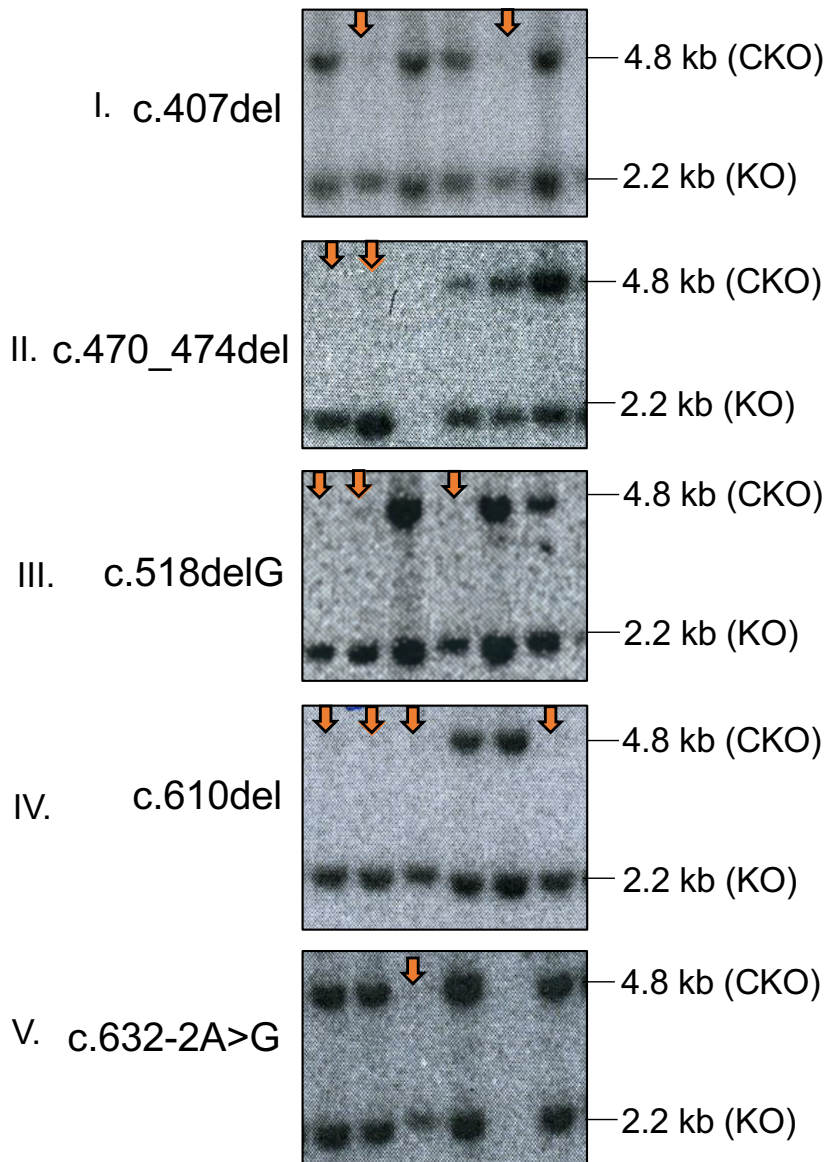

**Supplementary Figure 2. Sensitivity of mES cells expressing WT and BRCA2 variants to various DNA-damaging agents.**

**A-E.** Survival, estimated by XTT assay, of mESC expressing either WT or BRCA2 variants (A. c.407delA; B. c.470\_474delAGTCA, C. c.518delG, D. c.610delC, E. c.632-2A>G) in response to treatment with various DNA-damaging agents: MitomycinC (MMC, I); methyl-methane sulfonate (MMS, II); Camptothecin (III); Olaparib (IV); and cisplatin (V). Two independently generated clones were used for each variant. Error bars indicate standard deviations.

# Supplementary Figure 2

## A. c.407 del

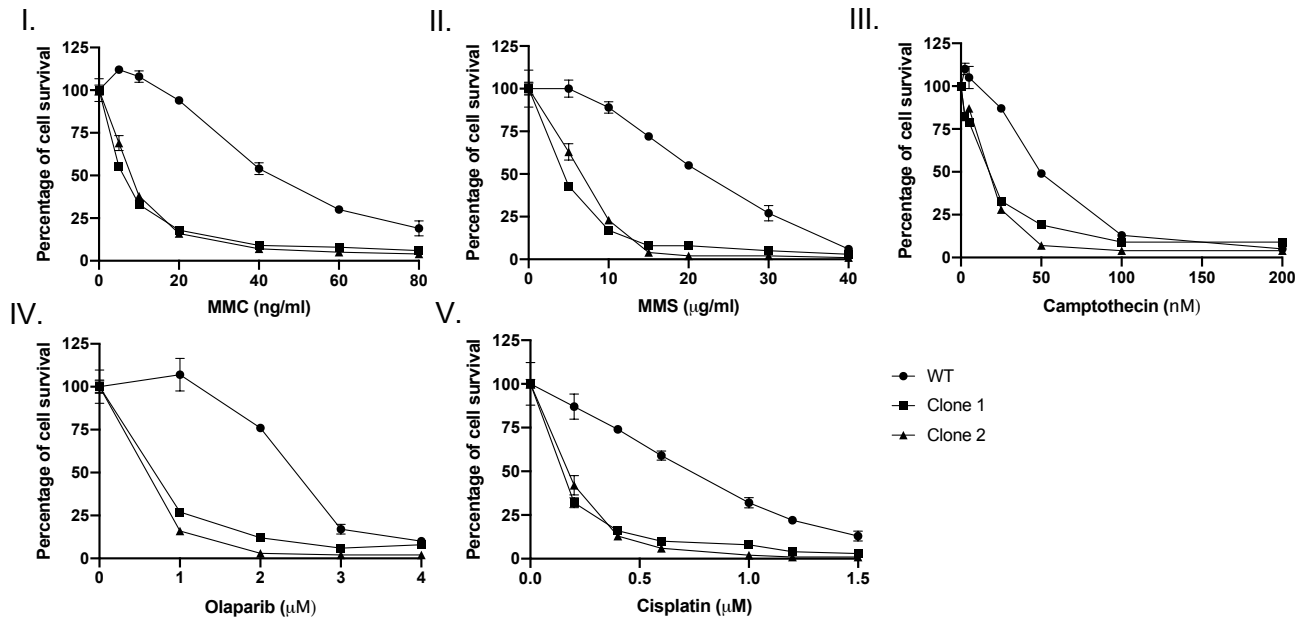

## B. c.470-474 del

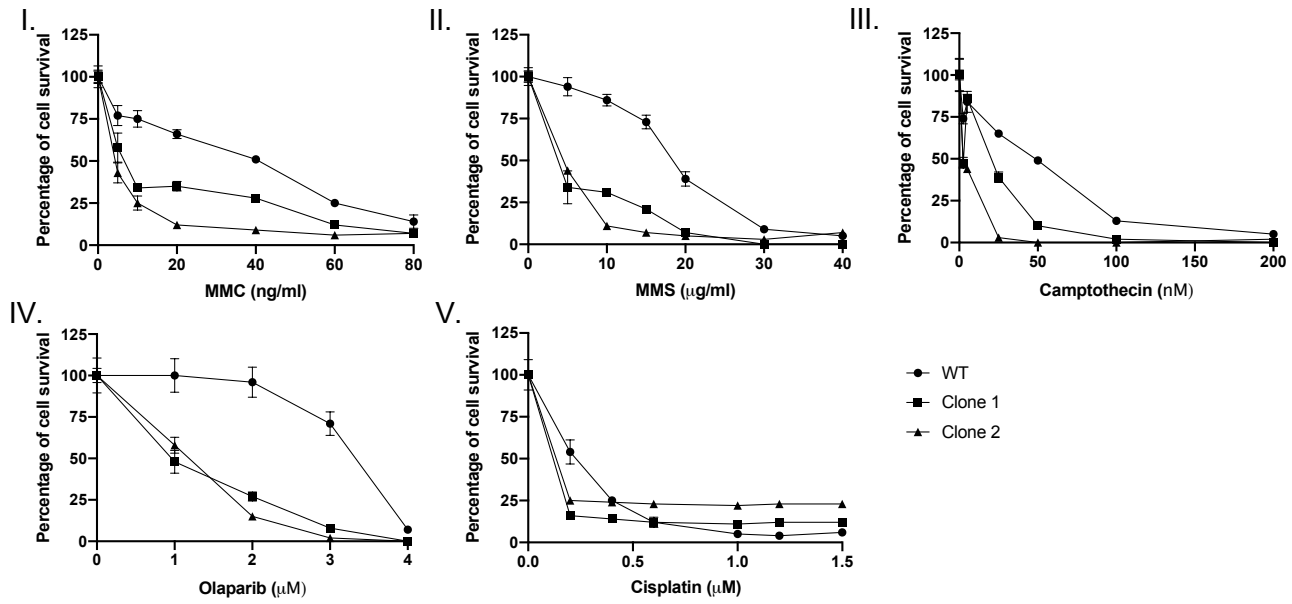

## C. c.518 delG

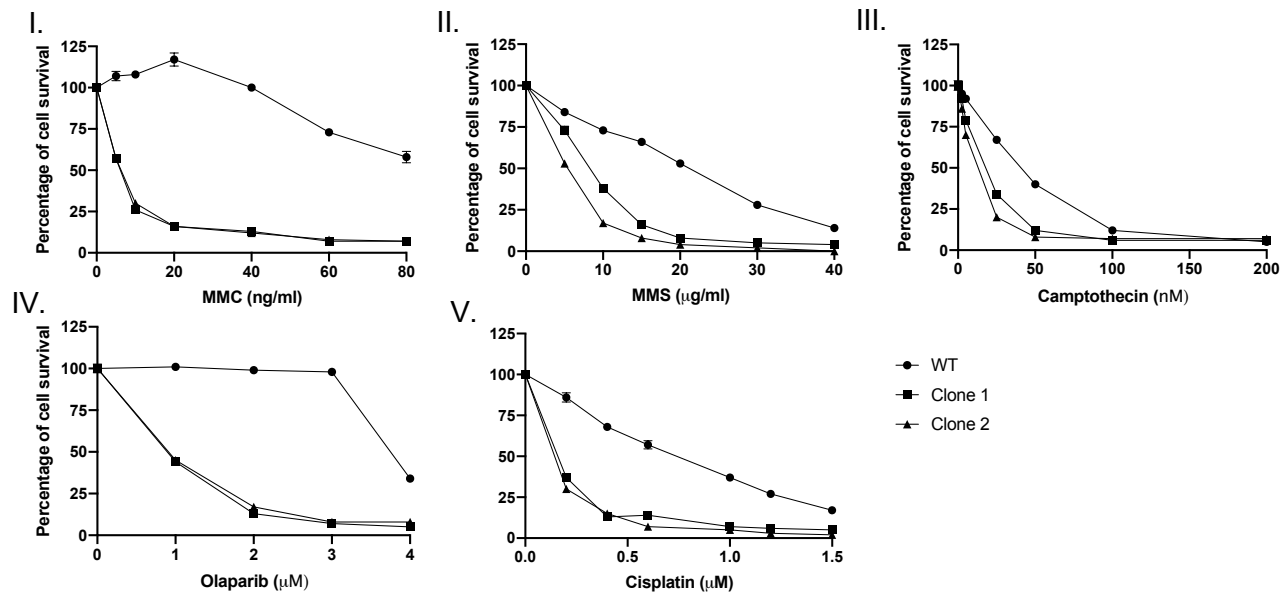

**D. c.610 del**

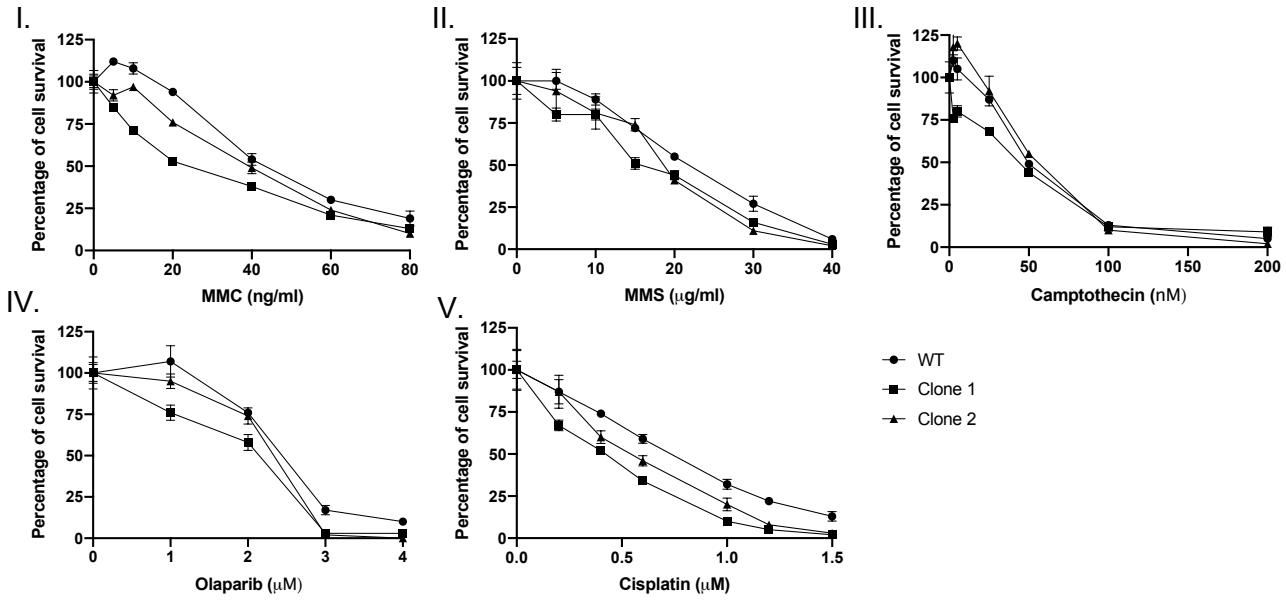

**E. c.632-2 A>G**

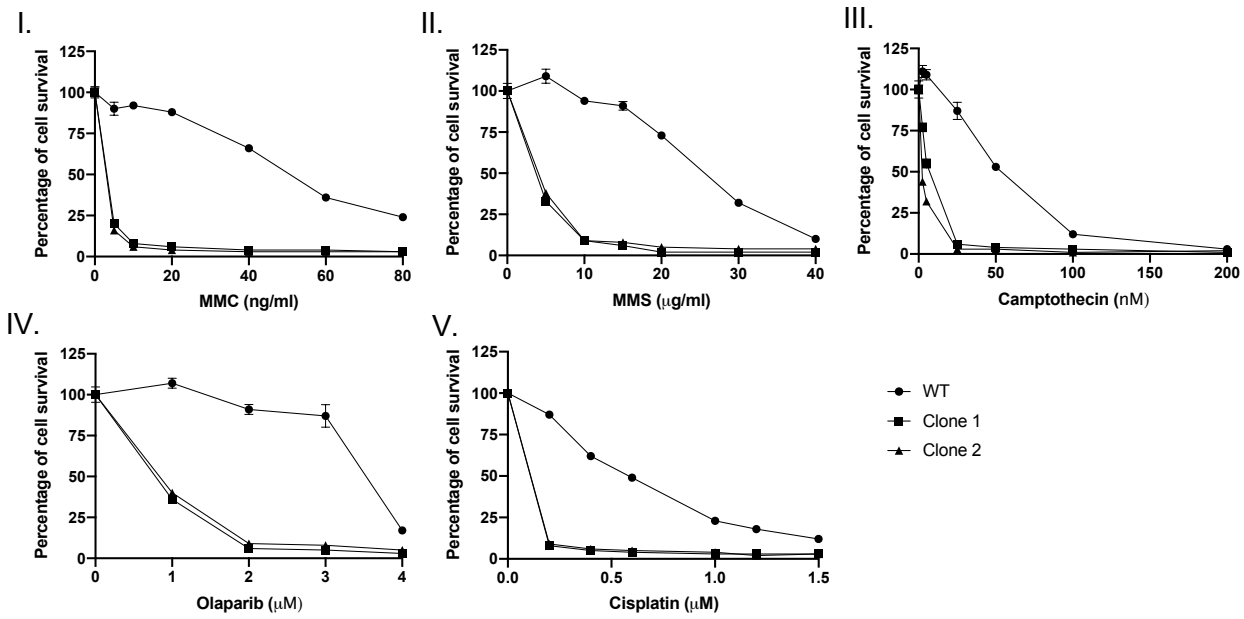

Supplement: NIHMS1616657-supplement-Supplementary_Table_and_Figures_1_2.pdf [file NIHMS1616657-supplement-Supplementary_Table_and_Figures_1_2.pdf]
